# Supplementary material
Source: publisher site journal article supplement (https://biss.pensoft.net/article/download/suppl/7972529/)
Supplement: Supplementary file 1

Standard name	Namespace	Documentation
Darwin Core (including extensions)	dwc	https://dwc.tdwg.org/terms/
ABCD (+EFG)	abcd	https://abcd.tdwg.org/
AIISO	aiiso	https://vocab.org/aiiso/
Dublin Core	dc	https://www.dublincore.org/specifications/dublin-core/dcmi-terms/
PROV (Provenance)	prov	https://www.w3.org/TR/prov-overview
The Organization Ontology	org	http://www.w3.org/TR/vocab-org/
FOAF	foaf	http://xmlns.com/foaf/spec/
Schema.org	schema	https://schema.org/
